# Supplementary material
Source: PubMed Central journal article supplement (PMC5209754)
Supplement: NIHMS762892-supplement-Supplement1.pdf [file NIHMS762892-supplement-Supplement1.pdf]

## Supplementary Appendix

This appendix has been provided by the authors to give readers additional information about their work.

Supplement to: Snyder PJ, Bhasin S, Cunningham GR, et al. Effects of testosterone treatment in older men. *N Engl J Med* 2016;374:611-24. DOI: 10.1056/NEJMoa1506119

# EFFECTS OF TESTOSTERONE TREATMENT OF OLDER MEN

## SUPPLEMENTARY APPENDIX TABLE OF CONTENTS

|                                                                                                                                           |    |
|-------------------------------------------------------------------------------------------------------------------------------------------|----|
| Roles of investigators and others in The Testosterone Trials .....                                                                        | 2  |
| Clinical Trial Sites .....                                                                                                                | 3  |
| Brigham Research Assay Core.....                                                                                                          | 5  |
| <i>Supplementary Figures and Tables:</i>                                                                                                  |    |
| Figure S1. Screening and Enrollment.....                                                                                                  | 12 |
| Figure S2. Serum Concentrations of Free Testosterone,<br>Estradiol, Dihydrotestosterone and Sex Hormone<br>Binding Globulin .....         | 13 |
| Figure S3. Association Between Changes in Testosterone and<br>Changes in Psychosexual Daily Questionnaire and<br>FACIT-Fatigue Scale..... | 14 |
| Figure S4. Patient Global Impression of Change.....                                                                                       | 15 |
| Table S1. Characteristics at Baseline of Men Enrolled in<br>Testosterone Trials .....                                                     | 16 |
| Table S2. Characteristics of Men Who Completed 12 Months in<br>The Testosterone Trials and Men Who Did Not. ....                          | 17 |
| Table S3. Sensitivity Analyses .....                                                                                                      | 18 |
| Table S4. Adverse Events During the First (Treatment) Year,<br>Second (Observation) Year, and Total of Both Years .....                   | 19 |
| Table S5. Incidence of Adverse Events >5% According to<br>MedDRA System Organ Class (Year 1).....                                         | 20 |
| Table S6. Incidence of Adverse Events >5% According to<br>MedDRA System Preferred Term (Year 1) .....                                     | 21 |

## ROLES OF INVESTIGATORS AND OTHERS IN THE TESTOSTERONE TRIALS

### Steering Committee

|                              |                                       |
|------------------------------|---------------------------------------|
| Peter J. Snyder, MD, Chair   | University of Pennsylvania            |
| Elizabeth Barrett-Connor, MD | University of California, San Diego   |
| Shalendar Bhasin, MD         | Harvard Medical School                |
| Jane A Cauley, DrPH          | University of Pittsburgh              |
| David Cella, PhD             | Northwestern University               |
| Jill P Crandall, MD          | Albert Einstein College of Medicine   |
| Glenn Cunningham, MD         | Baylor Medical School                 |
| Susan S Ellenberg, PhD       | University of Pennsylvania            |
| Kristine E Ensrud, MD, MPH   | University of Minnesota               |
| John T Farrar, MD, PhD       | University of Pennsylvania            |
| Thomas M Gill, MD            | Yale University                       |
| Cora E Lewis, MD, MSPH       | University of Alabama at Birmingham   |
| Alvin M Matsumoto, MD        | University of Washington              |
| Mark E Molitch, MD           | Northwestern University               |
| Marco Pahor, MD              | University of Florida                 |
| Susan Resnick, PhD           | National Institute of Aging           |
| Raymond C Rosen, PhD         | New England Research Institute        |
| Ronald S Swerdloff, MD       | University of California, Los Angeles |

### Statisticians (Department of Biostatistics and Epidemiology, University of Pennsylvania)

|                        |                             |
|------------------------|-----------------------------|
| Susan S Ellenberg, PhD |                             |
| Xiaoling Hou, MS       | Alisa Stephens-Shields, PhD |
| J Richard Landis, PhD  | Bret Zeldow, MS             |
| Liyi Cen, MD           | Renee H Moore, PhD          |

### Data Coordinating Center (Clinical Research Computing Unit, Department of Biostatistics and Epidemiology, University of Pennsylvania)

|                     |                            |
|---------------------|----------------------------|
| Denise Cifelli, MS  | Darlene Dougar, MPH        |
| Laura Fluharty, MPH | Laura Gallagher, MPH, CCRP |
| Shawn Ballard, MS   | Tracy Chai, MS             |
| James Dattilo, BS   | Trina Brown                |
| Sandra Smith, AS    | Fran Chicchi, BS           |

### Adjudicators of Cardiovascular and Cerebrovascular Adverse Events

|                        |                                     |
|------------------------|-------------------------------------|
| Scott E Kasner, MD     | University of Pennsylvania          |
| Cora E Lewis, MD, MSPH | University of Alabama at Birmingham |
| Steven R Messe, MD     | University of Pennsylvania          |
| Emile R Mohler III, MD | University of Pennsylvania          |

## Clinical Trial Sites

| Site                                       | PI                           | Co-Is and Sub-Is                                                                                                                                   | Research Coordinator(s)                                                                                                    |
|--------------------------------------------|------------------------------|----------------------------------------------------------------------------------------------------------------------------------------------------|----------------------------------------------------------------------------------------------------------------------------|
| 11 Albert Einstein College of Medicine     | Jill P. Crandall, MD         | Vafa Tabatabaie, MD<br>Eric Epstein, MD<br>Uriel Barzel, MD                                                                                        | Gilda Trandafirescu                                                                                                        |
| 12 Baylor College of Medicine              | Glenn R. Cunningham, MD      | N/A                                                                                                                                                | Emilia Cordero, MS, RN, ANP-C<br>Patti Marino                                                                              |
| 13 Brigham and Women's Hospital            | Shalender Bhasin, MD         | Shehzad Basaria, MD                                                                                                                                | Richard Eder<br>Erica Appleman<br>Kathleen Ann Halley                                                                      |
| 14 Northwestern University                 | Mark Molitch, MD             | Daniel Toft, MD<br>Amisha Wallia, MD                                                                                                               | Diane Larsen<br>Elaine Massaro, MS, RN<br>Daphne Adelman, BSN, MBA                                                         |
| 15 University of Alabama at Birmingham     | Cora E. Lewis, MD, MSPH      | James Shikany, DrPH<br>Peter Kolettis, MD                                                                                                          | Phillip Johnson<br>Margaret N. Pike, RN<br>Isabelle J. Joffrion, RN                                                        |
| 16 University of California at Los Angeles | Ronald Swerdloff, MD         | Christina Wang, MD                                                                                                                                 | Xiaodan Han, RN<br>Jamila Ashai                                                                                            |
| 17 University of California at San Diego   | Elizabeth Barrett-Connor, MD | Karen Herbst, MD<br>Heather Hofflich, DO<br>J. Kellogg Parsons, MD                                                                                 | Noralinda Kamantigue, BSN, RN<br>Mary Lou Carrion-Peterson, BSN, RN<br>Gabriela Reno<br>Lauren Claravall<br>Jean Smith, RN |
| 18 University of Florida                   | Marco Pahor, MD              | Susan Nayfield, MD, M.Sc<br>Stephen D. Anton, Ph.D.<br>Todd Manini, Ph.D<br>Philip Dahm, MD<br>Michael Marsiske, Ph.D<br>Bhanuprasad Sandesara, MD | Melissa Lewis<br>Mienecia L. Black, MPH<br>Jeffrey Knaggs<br>William Marena<br>Jane Ching-ju Lu, MPH                       |
| 19 University of Minnesota                 | Kristine E. Ensrud, MD, MPH  | Susan J. Diem, MD, MPH<br>Howard Fink, MD, MPH<br>Christopher Warlick, MD                                                                          | Sandra Potter, CCRC<br>Luanne Welch, RN<br>Pamela Van Covering, MA<br>Kristi Lee Jacobson<br>Lisa Miller                   |
| 20 University of Pittsburgh                | Jane Cauley, DrPH            | Mara J. Horwitz, MD<br>Susan L. Greenspan, MD<br>Thomas M. Jaffe, MD                                                                               | Linda Prebehalla, RN<br>Janet T. Bonk, RN, MPH<br>Jennifer L. Rush, MPH                                                    |
| 21 University of Washington                | Alvin M. Matsumoto, MD       | N/A                                                                                                                                                | Janet Gilchrist, RN<br>Kathy Winter<br>Magdalena Wojtowicz, RN                                                             |
| 22 Yale University                         | Thomas M. Gill, MD           | Natalie deRekeneire, MD<br>Susan Kashaf, MD<br>Lee Katz, MD<br>Hamid Mojibian, MD                                                                  | Joanne McGloin<br>Karen Wu<br>Dismayra Martinez, MA<br>Denise Shepard, BSN, MBA                                            |

## Data and Safety Monitoring Board

### Member

Michael O. Thorner, MD  
Eric Klein, MD  
Wayne A. Meikle, MD  
Wayne J. Hellstrom, MD  
J. Philip Miller, PhD (Chair)  
Richard Chappell, PhD  
George A. Kuchel, MD  
Manuel D. Cerqueira, MD  
E. Magnus Ohman, MD

### Affiliation

Department of Medicine, University of Virginia  
Cleveland Clinic  
University of Utah  
Department of Urology, Tulane University  
Washington University  
Department of Biostatistics, University of Wisconsin  
Division of Geriatrics, University of Connecticut  
Cleveland Clinic Nuclear Medicine  
Duke University Medical Center

## BRIGHAM RESEARCH ASSAY CORE

### Steroid Assay Procedures

#### **Measurement of Total Testosterone by a Centers for Disease Control (CDC) - Certified Liquid Chromatography Tandem Mass Spectrometry (LC-MS/MS) Assay**

Serum total testosterone concentration was measured using a previously published LC-MS/MS assay, which has been certified by the Centers for Disease Control's HoST Program.<sup>1-4</sup> Testosterone in human serum is extracted by solid phase extraction (SPE), separated by high performance liquid chromatography (HPLC), and measured by mass spectrometry (MS) in electrospray ionization (ESI<sup>+</sup>) source. Deuterated testosterone (16,16, 17-D<sub>3</sub> testosterone) was used as an internal standard for the calibration of assay.

The lower limit of quantitation was 1 ng/dL, and linear range 1 to 1000 ng/dL. The recovery was calculated by adding known amounts of testosterone to charcoal stripped serum and analyzing by LC-MS/MS was 102 +/- 2%. The correlation between the amount added and the amount measured by LC-MS/MS was 0.998. The cross-reactivity of DHEA, DHEAS, DHT, androstenedione and estradiol in the testosterone assay is negligible at ten times the circulating concentrations of these hormones. There is no measurable carryover effect on the blank after running the highest standard (2000 ng/dL). The assay has been validated for human serum and human heparin plasma. These two matrices exert no significant interference. The interassay coefficient of variation is 7.9% at 48.6 ng/dL, 7.7% at 241 ng/dL, 4.4% at 532 ng/dL, and 3.3% at

1016 ng/dL respectively. The interassay CV was <5% for the NIST female standard 971 and <2% for NIST male standard 971. As part of the Centers for Disease Control's (CDC) Testosterone Assay Harmonization Initiative, quality control samples provided by the CDC were run every three months; the coefficient of variation in quality control samples with testosterone concentrations in 100 to 1000 ng/dL range has consistently been less than 6.2%.

The reference range (280-873 ng/dL) was derived from a reference sample of healthy men, 19-40 years of age, participating in the Framingham Heart Study.<sup>1-4</sup> The assay was cross-calibrated against the CDC standards in September 2013, and the reference ranges were then adjusted using Deming's regression.

## **SHBG**

Serum SHBG concentration was measured using a two-site immunofluorometric assay (Beckman Instruments). The inter-assay CVs were 8.3%, 7.9%, and 10.9%, and intra-assay CVs 7.3%, 7.1% and 8.7%, respectively, in the low, medium, and high pools.

The analytical sensitivity of the assays was 0.5 nmol/L. The assay was been validated for human serum. The reference range for SHBG in men of the Framingham Heart Study is 15-72 nmol/L.

## **Free Testosterone**

Free testosterone was measured by equilibrium dialysis.<sup>2-3</sup> 200 uL serum was mixed with 3H-testosterone (10,000 cpm) and then dialyzed for 24 hours at 37C against a buffer mimicking the composition of protein-free plasma and containing gelatin using a dialysis membrane with a cut off of 10,000 daltons. The tracer was purified by celite chromatography prior to equilibrium dialysis to remove any 3H-water. Free testosterone was calculated as a product of total testosterone measured using LC-MS/MS and percent free testosterone determined using equilibrium dialysis. Reference range for free testosterone in healthy young men, 21-50 years of age, is 58-294 pg/ml.

### **5-alpha-dihydrotestosterone (DHT)**

Serum DHT concentration was measured using a derivatized LC-MS/MS assay. The serum samples were extracted using solid phase extraction (SPE), eluted by high performance liquid chromatography (HPLC), and determined by mass spectrometry (MS) in Electrospray Ionization (ESI<sup>+</sup>) source. Deuterated DHT was utilized as an internal standard for the calibration of assay. The recovery was  $\geq 81\%$ , linear range 1 to 100 ng/dL, and the lower limit of quantitation was 1 ng/dL. The inter-assay CV in quality control samples with concentrations of 5.2 ng/dL, 22.0 ng/dL, and 44.1 ng/dL were 6.1%, 6.5%, and 8.6%, respectively. The reference range, generated in a convenience sample of 100 healthy young men, 21-50 years of age, who were participating in a randomized trial, was 22 to 110 ng/dL.

### **Estradiol**



Estradiol was measured by LC-MS/MS after derivatization with dansyl chloride.<sup>6-8</sup> 20µL estrone-d4 and estradiol-d3 was added to 200µL serum, extracted with 1.2mL methyl t-butyl ether (5), derivatized using dansyl chloride (3.7mmol/L) in sodium carbonate (10mmol/L, pH10.5) at 60°C for 10-min, diluted in 50µL acetonitrile and water (1:1 volume ratio of acetonitrile and water), and injected in a C1 cartridge. Two-dimensional chromatographic separation is used. First-dimension separation was performed using a mobile phase consisting of methanol with 10mmol/L formic acid and 10mmol aqueous formic acid. The effluent is directed to second dimension separation on a Gemini Phenyl C6 column 100×2.0 mm with 3µm particles; the mobile phase consisted of acetonitrile with 10mmol/L formic acid and 10mmol/L aqueous formic acid.<sup>6</sup> Effluent of the first column is directed to waste during >90% of the analysis time; therefore, unreacted dansyl chloride and most derivatization byproducts are not transferred to the analytical column. Effluent from the analytical column is directed onto an API 4000 triple-quadrupole mass spectrometer (Applied Biosystems/MDS Sciex) with turbo ion spray ion source.

Two MS/MS transitions were monitored for each compound: for estrone, 504>171 and 504>156; for estrone-d4, 508>171 and 508>156; for estradiol, 506>171 and 506>156; for estradiol-d5, 509>171 and 509>156. The peak area ratio of the two transitions was used to assess possible interferences in each sample.<sup>6</sup> The linear range of the assay is 1 to 500 pg/mL. The lower limit of quantitation for both hormones is 2 pg/mL. Inter-assay CVs for estrone are 4.5%, 7.7%, and 6.9% at concentrations of 8, 77, and 209 pg/mL, respectively, and for estradiol 6.9%, 7.0%, and 4.8% at concentrations of 8, 77,

and 206 pg/ml, respectively. The cross-reactivity of testosterone, DHEA, DHEAS, DHT, androstenedione in the assay is negligible at ten times the circulating concentrations of these hormones. The reference range for estradiol in community dwelling men, 19-40 years of age, was 15-50 pg/mL.<sup>7</sup>

## References

1. Bhasin S, Pencina M, Jasuja GK, Travison TG, Coviello AD, Orwoll E, Wang PY, Nielson C, Wu F, Tajar A, Labrie F, and the EMAS group, Vesper H, Zhang, A, Ulloor J, Singh R, D'Agostino R, Vasani RS. Reference ranges for testosterone in nonobese men generated using liquid chromatography tandem mass spectrometry in a community-based sample of healthy non-obese young men in the Framingham Heart Study and applied to three geographically distinct cohorts. *J Clin Endocrinol Metab* 2011;96:2430-9
2. Ohlsson C, Lunetta KL, Stolk L, Perry JRB, Koster A, Petersen A-K, Eriksson J, Lehtimäki T, Huhtaniemi IT, Hammond GL, Maggio M, Coviello AD, Ferrucci L, Heier M, Hofman A, Holliday KL, Jansson J-O, Kähönen M, Karasik D, Karlsson MK, Kiel DP, Liu Y, Ljunggren O, Lorentzon M, Lyytikäinen L-P, Meitinger T, Mellström D, Melzer D, Miljkovic I, Nauck M, Nilsson M, Penninx B, Pye SR, Vasani R, Reincke M, Rivadeneira F, Tajar A, Teumer A, Uitterlinden AG, Ulloor J, Viikari J, Völker U, Völzke H, Wichmann HE, Zhuang WV, Ziv E, Wu FCW, Raitakari O, Eriksson A, Bidlingmaier M, Harris TB, Murray A, de Jong F, Murabito JM, Bhasin S, Vandenput L, Haring R. Genetic determinants of serum

testosterone concentrations in men. PLOS Genet 2011(10):e1002313. Epub 2011 Oct 6.

3. Bhasin S, Travison TG, Storer TW, Lakshman K, Kaushik M, Mazer NA, Ngyuen AH, Davda MN, Jara H, Aakil A, Anderson S, Knapp PE, Hanka S, Mohammed N, Daou P, Miciek R, Ulloor J, Zhang A, Brooks B, Orwoll K, Hede-Brierley L, Eder R, Elmi A, Bhasin G, Collins L, Singh R, Basaria S. Effect of testosterone supplementation with and without a dual 5 $\alpha$ -reductase inhibitor on fat-free mass in adult men with suppressed testosterone production: a randomized trial. JAMA 2012;307:931-9.
4. Vesper HW, Bhasin S, Wang C, Tai SS, Dodge LA, Singh RJ, Nelson J, Ohorodnik S, Clarke NJ, Salameh WA, Parker CR Jr, Razdan R, Monsell EA, Myers GL. Interlaboratory comparison study of serum total testoserone measurements performed by mass spectrometry methods. Steroids. 2009;74:498-503.
5. Bhasin S, Jasjua GK, Pencina M, D'Agostino R, Sr., Coviello AD, Vasan RS, Travison TG. Sex-hormone binding globulin, but not testosterone, is associated prospectively and independently with incident metabolic syndrome in men: The Framingham Heart Study. Diabetes Care 2011;34:2464-70.
6. Kushnir MM, Rockwood AL, Bergquist J, et al. High-sensitivity tandem mass spectrometry assay for serum estrone and estradiol. Am J Clin Pathol. 2008;129:530-9.

7. Jasuja GK, Trivison TG, Davda M, Zhang A, Kushnir MM, Rockwood AL, Meikle W, Pencina MJ, Coviello A, Rose AJ, D'Agostino R, Vasani RS, Bhasin S. Estrone levels are associated with diabetes risk in men of the Framingham Heart Study. *Diabetes Care* 2013 in press
8. Jasuja GK, Trivison TG, Davda M, Murabito JM, Basaria S, Zhang A, Kushnir MM, Rockwood AL, Meikle W, Pencina MJ, Coviello A, Rose AJ, D'Agostino R, Vasani RS, Bhasin S. Age Trends in estradiol and estrone levels measured using liquid chromatography tandem mass spectrometry in community-dwelling men of the Framingham Heart Study. *J Gerontol A Biol Sci Med Sci* 2013;68(6):733-40.

Figure S1. Screening and Enrollment

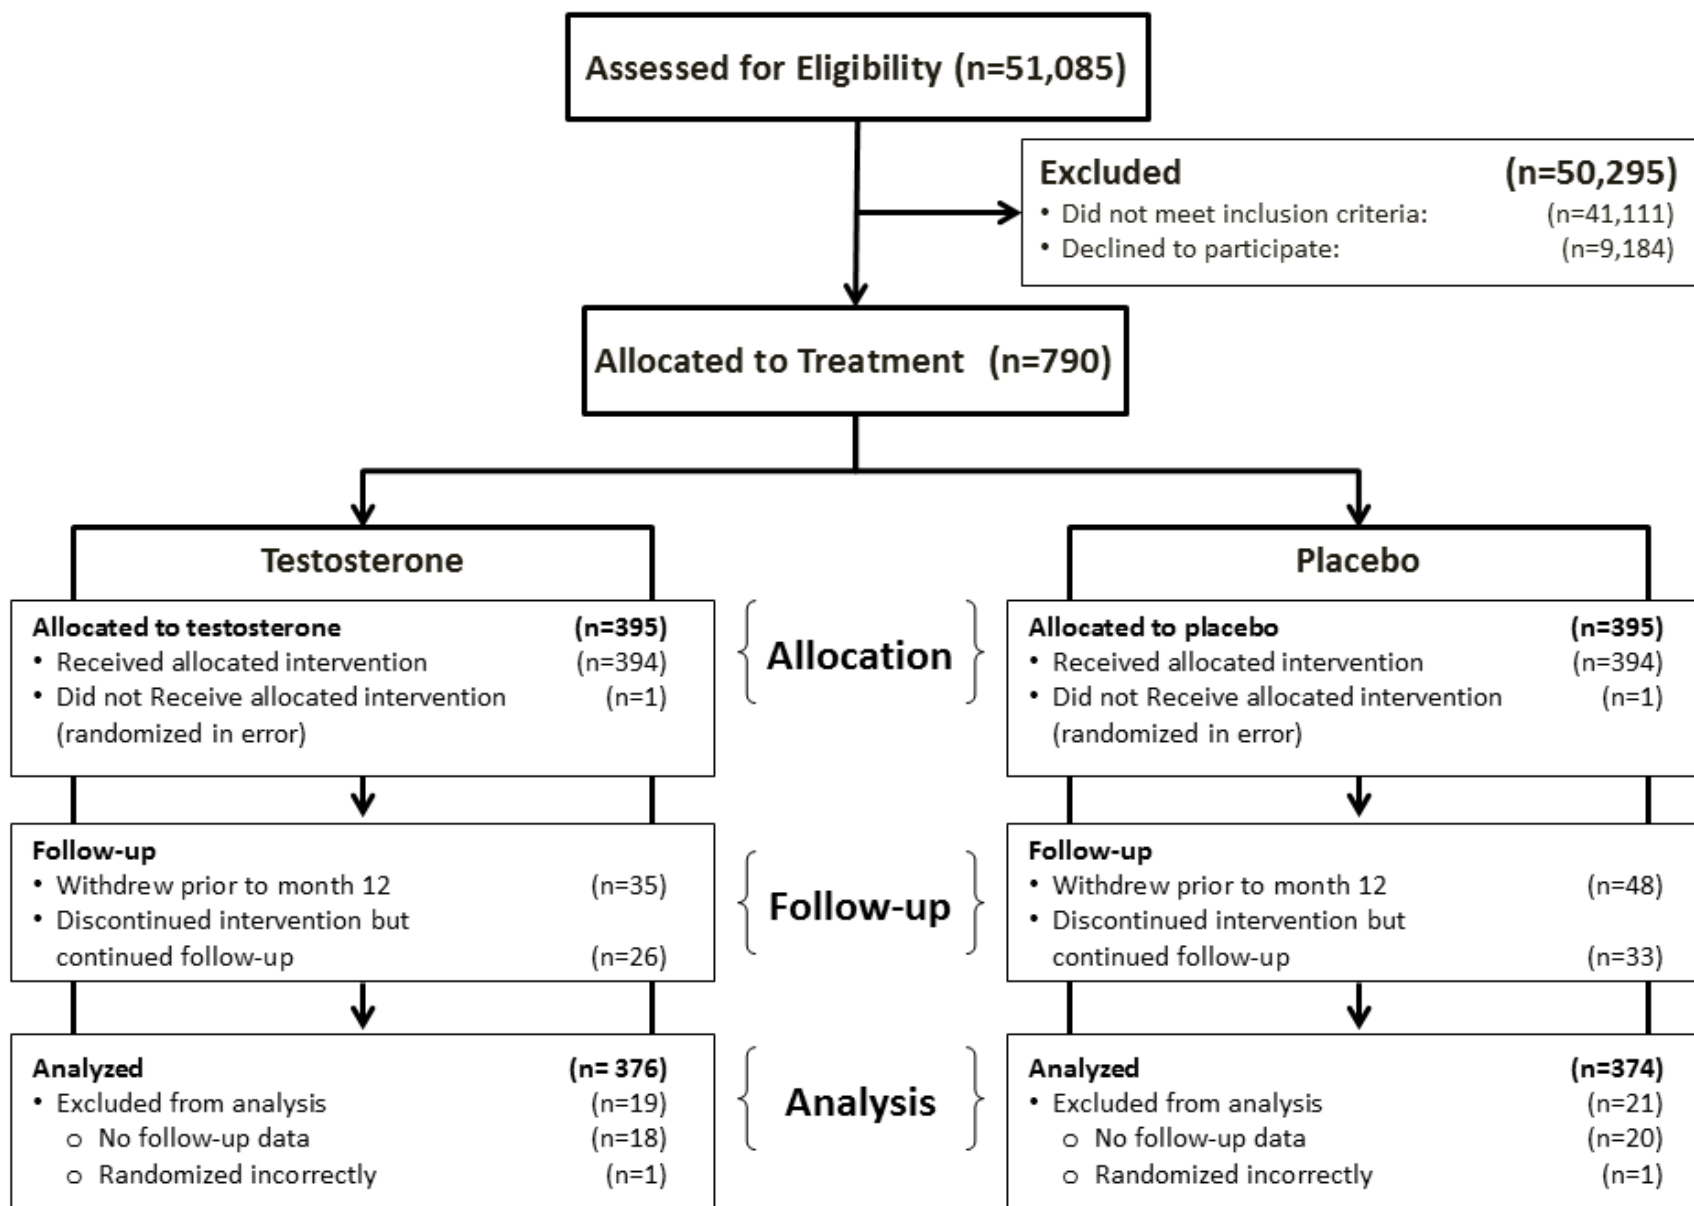

Screening and retention of participants

Figure S2. Serum Concentrations of Free Testosterone, Estradiol, Dihydrotestosterone (DHT) and Sex Hormone Binding Globulin (SHBG)

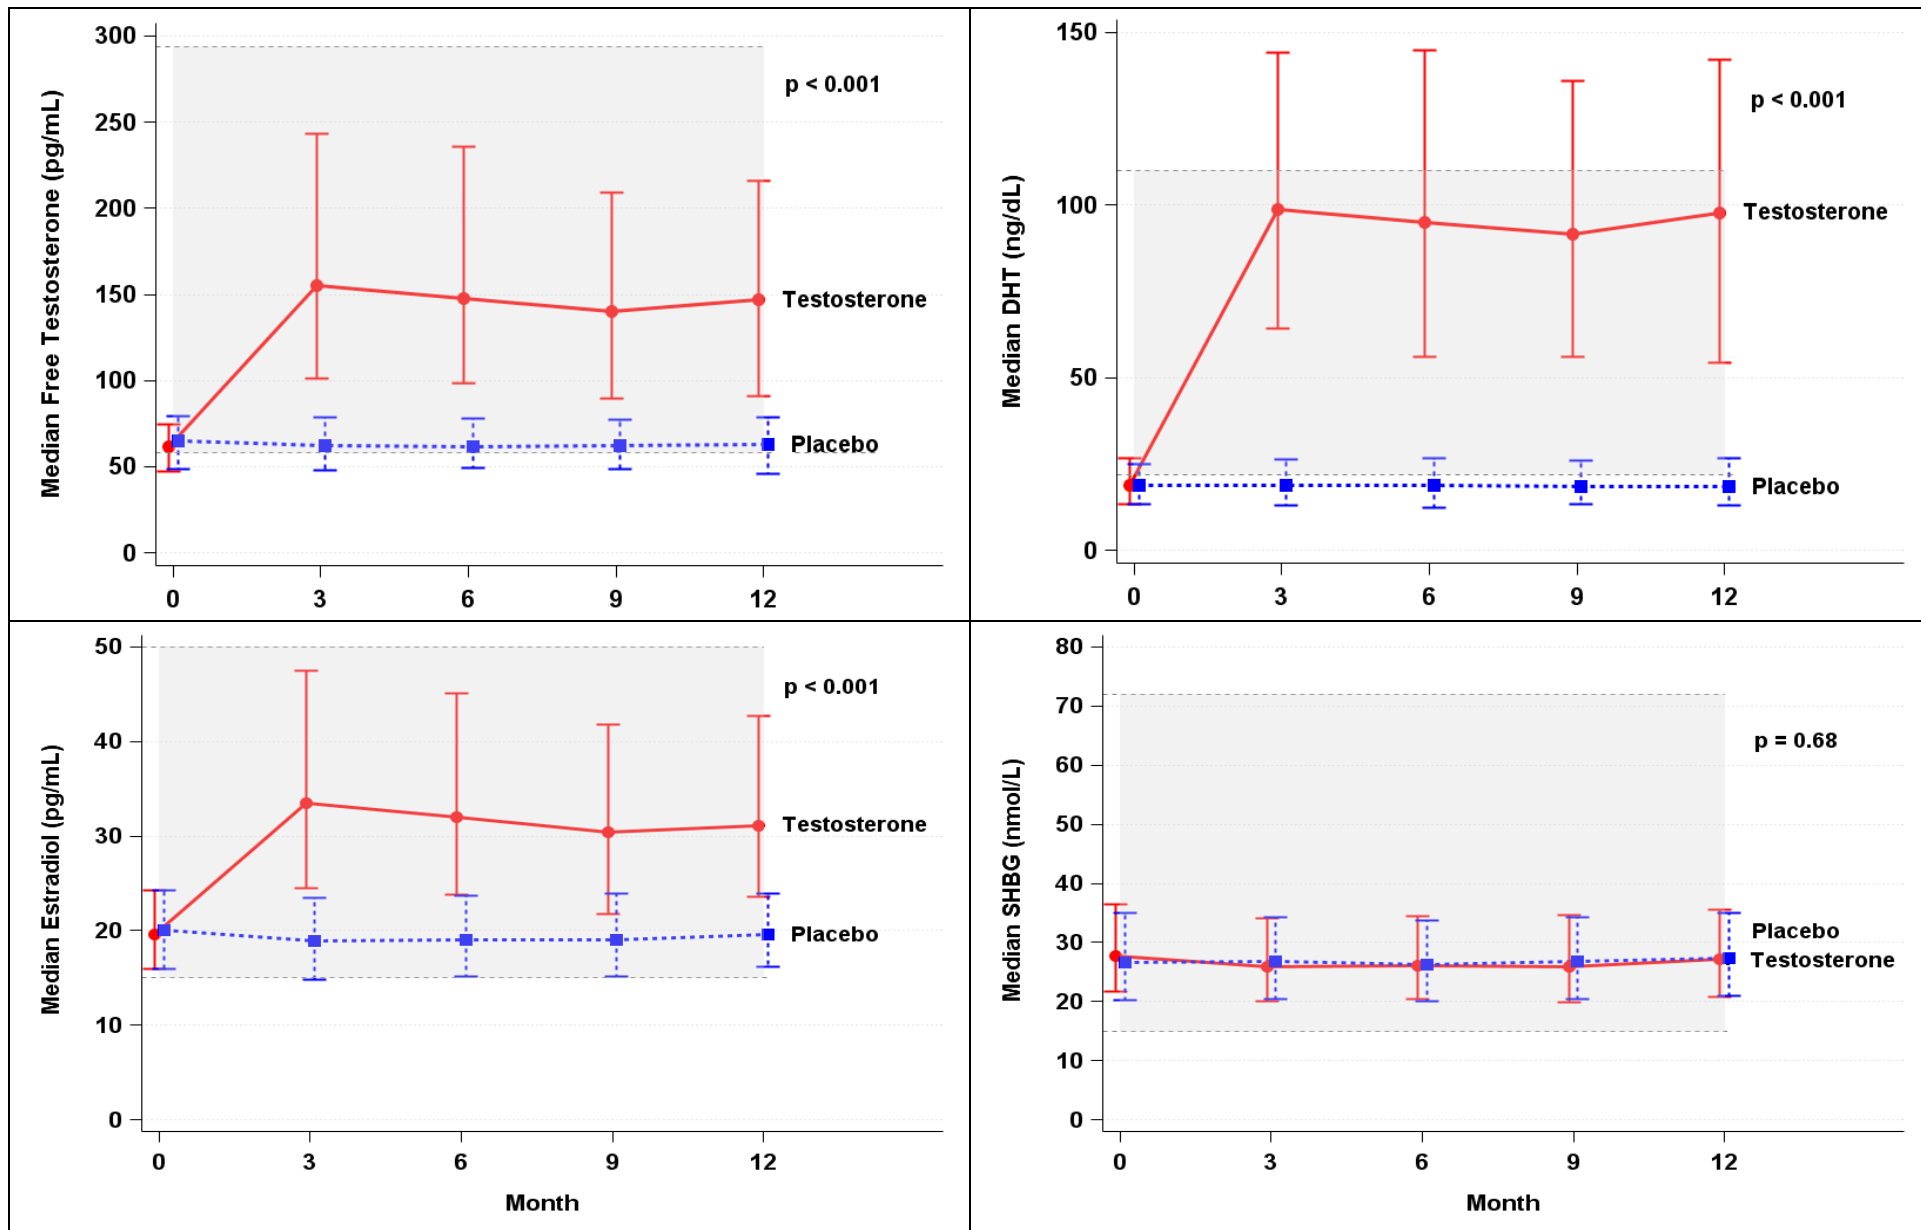

Median (interquartile ranges) serum concentrations of free testosterone, estradiol, dihydrotestosterone and sex hormone binding globulin in response to testosterone or placebo treatment from baseline to 12 months in men participating in The Testosterone Trials. To convert the values for free testosterone, estradiol and dihydrotestosterone to nmol/L, multiply by 3.47, 3.67 and 0.0344, respectively.

**Figure S3. Association between changes in testosterone and changes in Psychosexual Daily Questionnaire and in FACIT-Fatigue Scale**

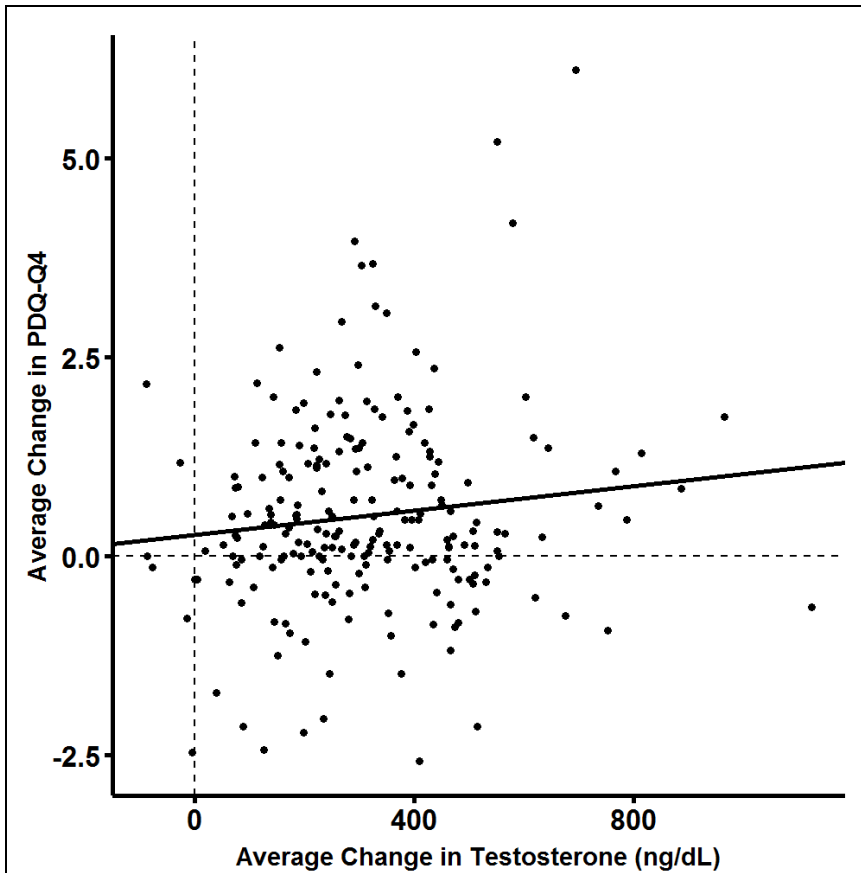

The top panel shows the unadjusted association between the average change in total testosterone and the average change in the Question 4 of the Psychosexual Daily Questionnaire (PDQ-Q4) during months 3-12 in men in the testosterone arm of the Sexual Function Trial. Instrumental variable methods indicated a significant effect of the change in total testosterone on the change in PDQ-Q4 ( $p < 0.001$ ).

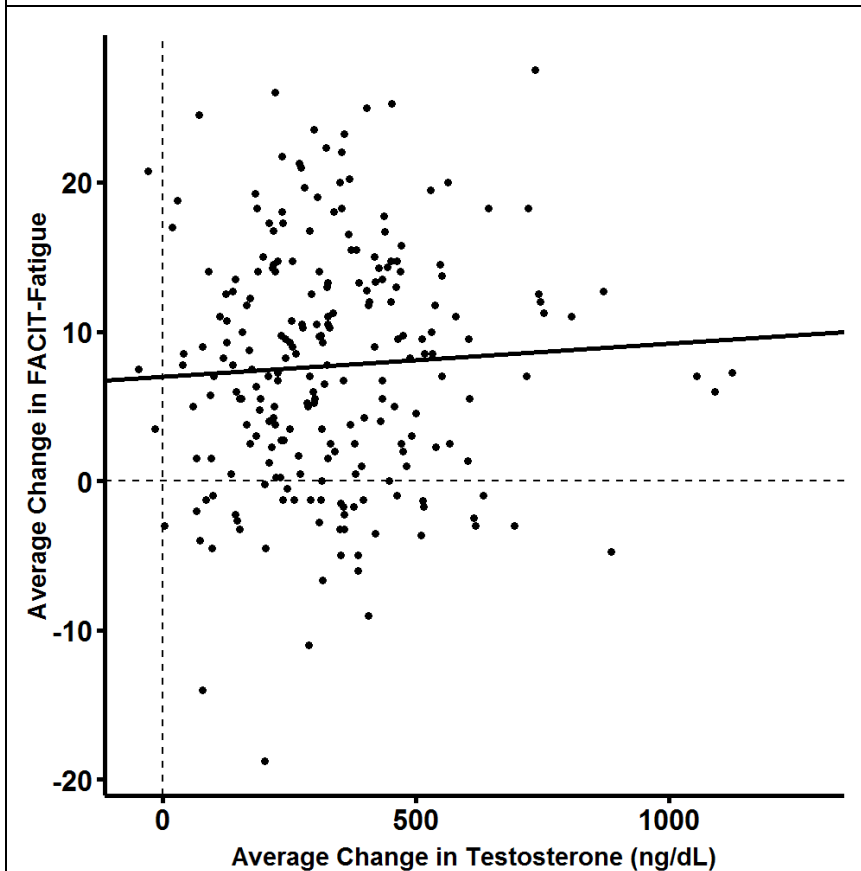

The bottom panel shows the unadjusted association between the average change in total testosterone and the average change in the FACIT-Fatigue scale during months 3-12 in men in the testosterone arm of the Vitality Trial. Instrumental variable methods indicated a significant effect of the change in total testosterone on the change in the FACIT-Fatigue scale ( $p = 0.02$ ).

**Figure S4. Patient Global Impression of Change**

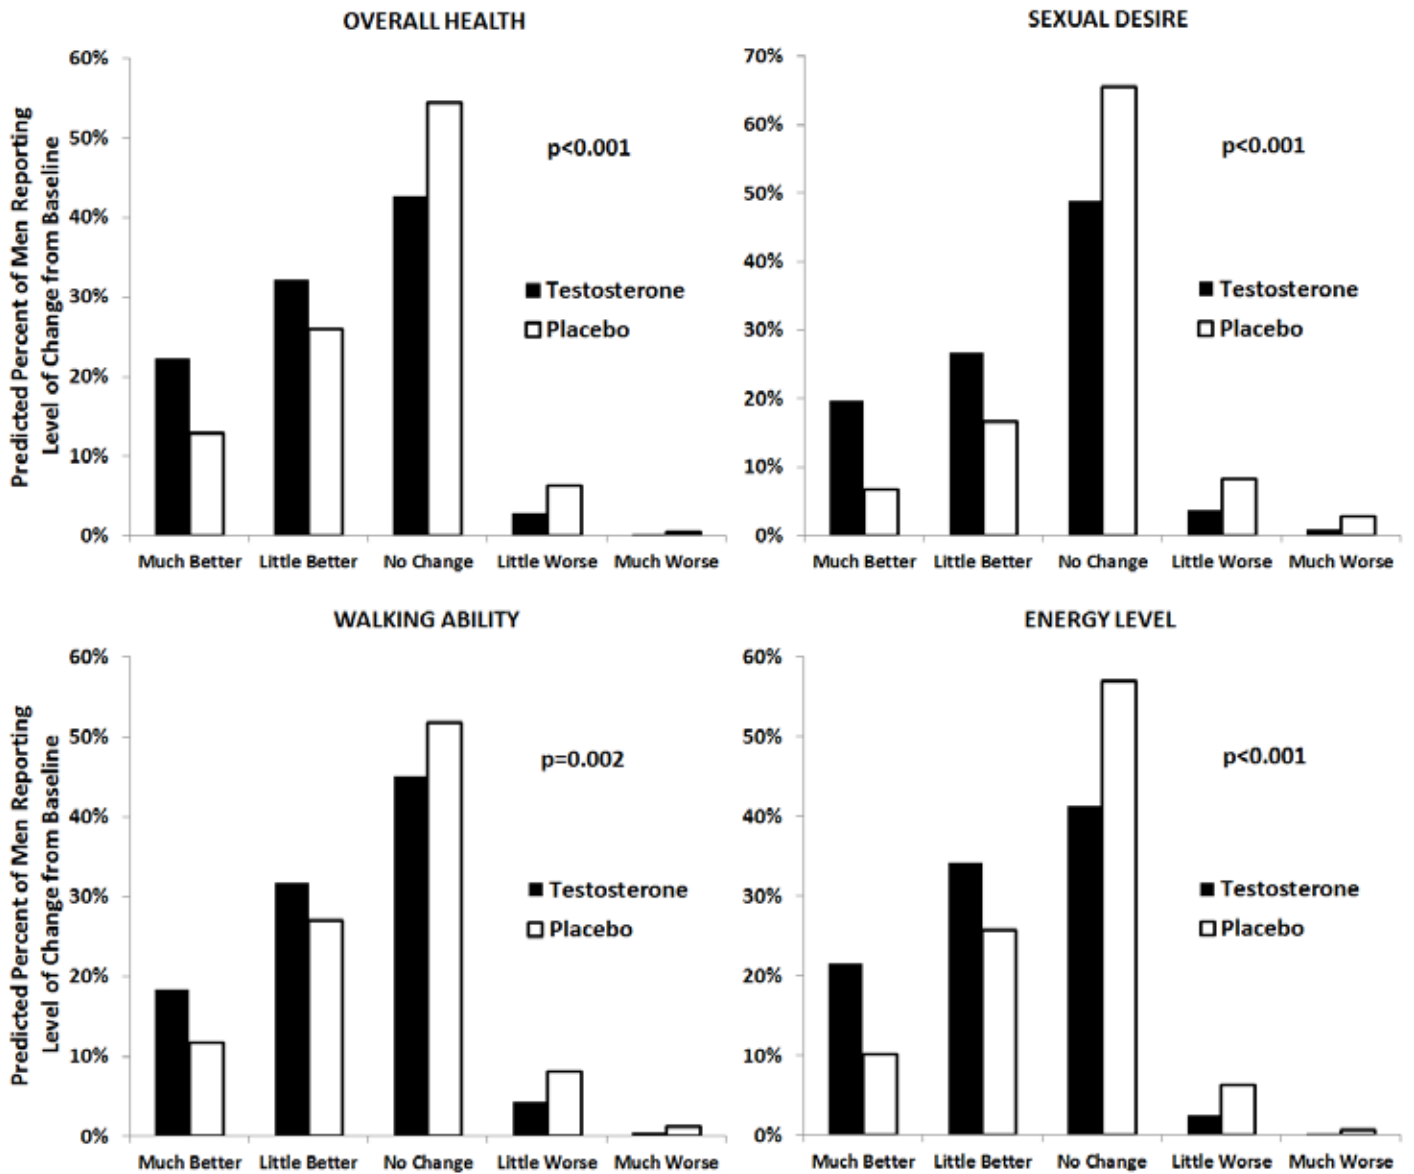

Responses to patient global impression of change questions. At months 3, 6, 9 and 12, participants were asked, “Since the beginning of the trial, has your (overall health, or sexual desire, or walking ability, or energy) been “much better”, “a little better”, not changed”, “a little worse” or “much worse”. The predicted proportion of participants responding in each category by treatment arm was estimated by multinomial regression adjusted for balancing factors. Presented predicted proportions were averaged over time.



**Table S1. Characteristics at Baseline of Men Enrolled in Testosterone Trials**

| Characteristics                                         | Treatment Group |              |
|---------------------------------------------------------|-----------------|--------------|
|                                                         | Placebo         | Testosterone |
| N                                                       | 395             | 395          |
| <b>Demographics</b>                                     |                 |              |
| Age (yr)                                                | 72.3 ± 5.8      | 72.1 ± 5.7   |
| Race                                                    |                 |              |
| Caucasian (%)                                           | 351 (88.9%)     | 349 (88.4%)  |
| African-American (%)                                    | 20 (5.1%)       | 21 (5.3%)    |
| Other (%)                                               | 24 (6.1%)       | 25 (6.3%)    |
| Ethnicity                                               |                 |              |
| Hispanic (%)                                            | 10 (2.5%)       | 18 (4.6%)    |
| Non-Hispanic (%)                                        | 385 (97.5%)     | 376 (95.2%)  |
| College graduate (%)                                    | 198 (50.1%)     | 214 (54.2%)  |
| Married or living with partner (%)                      | 304 (77.0%)     | 290 (73.4%)  |
| <b>Concomitant conditions</b>                           |                 |              |
| BMI (kg/m <sup>2</sup> )                                | 31.0 ± 3.6      | 31.0 ± 3.5   |
| BMI >30 (%)                                             | 246 (62.3%)     | 251 (63.5%)  |
| Alcohol Use (no. drinks/week)                           | 3.4 ± 5.0       | 3.0 ± 4.3    |
| Smoking <sup>1</sup>                                    |                 |              |
| Current smoker (%)                                      | 34 (8.6%)       | 30 (7.6%)    |
| Ever smoker (%)                                         | 268 (67.9%)     | 256 (64.8%)  |
| Diabetes (%)                                            | 144 (36.5%)     | 148(37.5%)   |
| Hypertension (%)                                        | 280 (70.9%)     | 286 (72.4%)  |
| History of myocardial infarction (%)                    | 63 (16.0%)      | 53 (13.4%)   |
| History of stroke (%)                                   | 17 (4.3%)       | 16 (4.1%)    |
| Sleep apnea                                             | 76 (19.2%)      | 78 (19.8%)   |
| International Prostate Symptom Score                    | 9.6 ± 5.3       | 9.0 ± 5.2    |
| Risk(%) of all prostate cancer                          | 17.6 ± 6.0      | 17.3 ± 6.0   |
| Risk(%) of high-grade prostate cancer                   | 3.0 ± 1.7       | 2.9 ± 1.7    |
| <b>Medication Use</b>                                   |                 |              |
| Alpha blocking agents (%)                               | 47(12.0%)       | 56 (14.0%)   |
| 5-alpha reductase inhibitors (%)                        | 16 (4.1%)       | 15 (3.8%)    |
| Phosphodiesterase inhibitors (%)                        | 36 (9.1%)       | 30 (7.6%)    |
| <b>Sex Hormones</b>                                     |                 |              |
| Testosterone (ng/dL)                                    | 236 ± 67        | 232 ± 63     |
| Free testosterone (pg/mL)                               | 65.0 ± 23.4     | 62.0 ± 21.4  |
| Dihydrotestosterone (ng/dL)                             | 20.9 ±13.0      | 21.3 ±11.6   |
| Estradiol (pg/mL)                                       | 20.4 ± 6.4      | 20.3 ± 6.7   |
| Sex hormone binding globulin (nM)                       | 29.5 ± 14.7     | 31.4 ± 15.2  |
| <b>Performance</b>                                      |                 |              |
| Mini-mental State Examination                           | 28.4 ± 1.7      | 28.4 ± 1.7   |
| Gait speed (m/s)                                        | 1.1 ± 0.2       | 1.1 ± 0.2    |
| Derogatis Interview for Sexual Function - Sexual Desire | 14.0 ± 7.8      | 13.9 ± 7.7   |
| FACIT-Fatigue                                           | 36.8 ± 8.8      | 37.0 ± 8.6   |

<sup>1</sup> Includes cigarettes or cigars

**Table S2. Characteristics of Men Who Completed 12 Months and Those of Men Who Did Not**

| <b>Characteristics</b>                                  |                                 | <b>Completed</b> | <b>Did Not Complete</b> |
|---------------------------------------------------------|---------------------------------|------------------|-------------------------|
| N                                                       |                                 | 705              | 85                      |
| <b>Demographics</b>                                     |                                 |                  |                         |
| Age (yr)                                                |                                 | 72.0 ± 5.7       | 73.2 ± 6.0              |
| Race                                                    |                                 |                  |                         |
| Caucasian (%)                                           |                                 | 626 (88.8%)      | 74 (87.1%)              |
| African-American (%)                                    |                                 | 35 (5.0%)        | 6 (7.1%)                |
| Other (%)                                               |                                 | 44 (6.2%)        | 5 (5.9%)                |
| Ethnicity                                               | Hispanic (%)                    | 27 (3.8%)        | 1 (1.2%)                |
|                                                         | Non-Hispanic (%)                | 677 (96.0%)      | 84 (98.8%)              |
| College graduate (%) <sup>1</sup>                       |                                 | 358 (50.8%)      | 54 (63.5%)              |
| Married or living with partner (%)                      |                                 | 527 (74.7%)      | 67 (78.8%)              |
| <b>Concomitant conditions</b>                           |                                 |                  |                         |
| BMI (kg/m <sup>2</sup> )                                |                                 | 31.0 ± 3.5       | 31.0 ± 3.7              |
| BMI >30 (%)                                             |                                 | 444 (63.0%)      | 53 (62.4%)              |
| Alcohol Use (no. drinks/week)                           |                                 | 3.2 ± 4.8        | 3.1 ± 4.0               |
| Smoking                                                 | Current smoker (%) <sup>2</sup> | 62 (8.8%)        | 2 (2.4%)                |
|                                                         | Ever smoker (%)                 | 465 (66.0%)      | 59 (69.4%)              |
| Diabetes (%)                                            |                                 | 264 (37.4%)      | 28(32.9%)               |
| Hypertension (%) <sup>3</sup>                           |                                 | 495 (70.2%)      | 71 (83.5%)              |
| History of myocardial infarction (%)                    |                                 | 107 (15.2%)      | 9 (10.6%)               |
| History of stroke (%)                                   |                                 | 29 (4.1%)        | 4 (4.7%)                |
| Sleep apnea                                             |                                 | 143 (20.3%)      | 11 (12.9%)              |
| International Prostate Symptom Score <sup>1</sup>       |                                 | 9.1 ± 5.1        | 10.6 ± 6.0              |
| Risk(%) of all prostate cancer                          |                                 | 17.6 ± 6.0       | 16.8 ± 5.7              |
| Risk(%) of high-grade prostate cancer                   |                                 | 2.9 ± 1.7        | 2.9 ± 1.6               |
| <b>Medication Use</b>                                   |                                 |                  |                         |
| Alpha blocking agents (%)                               |                                 | 71(10.1%)        | 7 (8.2%)                |
| 5-alpha reductase inhibitors (%)                        |                                 | 27 (3.8%)        | 4 (4.7%)                |
| Phosphodiesterase inhibitors (%)                        |                                 | 62 (8.8%)        | 4 (4.7%)                |
| <b>Sex Hormones</b>                                     |                                 |                  |                         |
| Testosterone (ng/dL)                                    |                                 | 233 ± 65         | 245 ± 64                |
| Free testosterone (pg/mL)                               |                                 | 63.0 ± 22.2      | 67.0 ± 24.5             |
| Dihydrotestosterone (ng/dL)                             |                                 | 21.1 ±12.6       | 20.7 ±10.0              |
| Estradiol (pg/mL)                                       |                                 | 20.3 ± 6.4       | 21.1 ± 7.3              |
| Sex hormone binding globulin (nM)                       |                                 | 30.2 ± 14.9      | 32.8 ± 15.7             |
| <b>Performance</b>                                      |                                 |                  |                         |
| Mini-mental State Examination                           |                                 | 93.1 ± 5.7       | 92.2 ± 6.5              |
| Gait speed (m/s)                                        |                                 | 1.1 ± 0.2        | 1.0 ± 0.3               |
| Derogatis Interview for Sexual Function - Sexual Desire |                                 | 14.0 ± 7.9       | 12.8 ± 7.5              |
| FACIT-Fatigue                                           |                                 | 37.0 ± 8.7       | 36.5 ± 8.5              |

<sup>1</sup>p = 0.03, <sup>2</sup>p = 0.04, <sup>3</sup>p = 0.01

**Table S3. Sensitivity Analyses**

|                                                                | <b>Testosterone (vs. Placebo)</b> |                       |                |
|----------------------------------------------------------------|-----------------------------------|-----------------------|----------------|
| <b>SEXUAL FUNCTION TRIAL</b>                                   | <b>Effect</b>                     | <b>Standard error</b> | <b>P-value</b> |
| Primary Analysis                                               | 0.5788                            | 0.1041                | <0.0001        |
| Completers                                                     | 0.5146                            | 0.1081                | <0.0001        |
| Non-completers                                                 | 0.5258                            | 0.4834                | 0.2813         |
| <b>Patter n Mixture Effect (Completers and Non-completers)</b> | 0.5158                            | 0.1094                | <0.0001        |
| Shared Random Effects Model                                    | 0.6123                            | 0.1772                | 0.0006         |
| <b>SEXUAL FUNCTION – ALL PARTICIPANTS</b>                      |                                   |                       |                |
| Primary Analysis                                               | 0.6234                            | 0.08826               | <0.0001        |
| Completers                                                     | 0.6315                            | 0.09261               | <0.0001        |
| Non-completers                                                 | 0.4747                            | 0.3573                | 0.1869         |
| <b>Patter n Mixture Effect (Completers and Non-completers)</b> | 0.6154                            | 0.0908                | <0.0001        |
| Shared Random Effects Model                                    | 0.6201                            | 0.1369                | <0.0001        |
| <b>PHYSICAL FUNCTION TRIAL</b>                                 | <b>Log Odds Ratio</b>             | <b>Standard error</b> | <b>P-value</b> |
| Primary Analysis                                               | 0.3531                            | 0.2756                | 0.2008         |
| Completers                                                     | 0.3635                            | 0.2882                | 0.2080         |
| Non-completers                                                 | -0.5563                           | 1.3893                | 0.6916         |
| <b>Patter n Mixture Effect (Completers and Non-completers)</b> | 0.2815                            | 0.2903                | 0.3322         |
| Shared Random Effects Model                                    | 0.4135                            | 0.4545                | 0.3633         |
| <b>PHYSICAL FUNCTION – ALL PARTICIPANTS</b>                    |                                   |                       |                |
| Primary Analysis                                               | 0.5665                            | 0.1923                | 0.0033         |
| Completers                                                     | 0.5977                            | 0.2010                | 0.0030         |
| Non-completers                                                 | -0.3451                           | 0.8266                | 0.6775         |
| <b>Patter n Mixture Effect (Completers and Non-completers)</b> | 0.5042                            | 0.1988                | 0.0112         |
| Shared Random Effects Model                                    | 0.7806                            | 0.3317                | 0.0187         |
| <b>VITALITY TRIAL</b>                                          | <b>Log Odds Ratio</b>             | <b>Standard error</b> | <b>P-value</b> |
| Primary Analysis                                               | 0.2090                            | 0.2035                | 0.3049         |
| Completers                                                     | 0.1644                            | 0.2145                | 0.4440         |
| Non-completers                                                 | 0.6624                            | 0.8550                | 0.4422         |
| <b>Patter n Mixture Effect (Completers and Non-completers)</b> | 0.2215                            | 0.2137                | 0.3000         |
| Shared Random Effects Model                                    | 0.3513                            | 0.3080                | 0.2544         |
| <b>VITALITY – ALL PARTICIPANTS</b>                             |                                   |                       |                |
| Primary Analysis                                               | 0.2040                            | 0.1657                | 0.2185         |
| Completers                                                     | 0.1663                            | 0.1750                | 0.3421         |
| Non-completers                                                 | 0.4264                            | 0.7845                | 0.5883         |
| <b>Patter n Mixture Effect (Completers and Non-completers)</b> | 0.1967                            | 0.1797                | 0.2737         |
| Shared Random Effects Model                                    | 0.3435                            | 0.2642                | 0.1938         |

**Table S4.** Adverse Events During the First (Treatment) Year, Second (Observation) Year, and Total of Both Years

| Event                                         | Year 1  |                | Year 2         |                | Total            |                  |
|-----------------------------------------------|---------|----------------|----------------|----------------|------------------|------------------|
|                                               | Placebo | Testosterone   | Placebo        | Testosterone   | Placebo          | Testosterone     |
| <b>N</b>                                      | 394     | 394            | 360            | 347            | 394              | 394              |
| <b>Prostate</b>                               |         |                |                |                |                  |                  |
| PSA Increase $\geq 1.0$ ng/mL                 | 8       | 23             | 5              | 6              | 11 <sup>1</sup>  | 28 <sup>1</sup>  |
| Prostate biopsy                               | 0       | 1              | 2              | 2              | 2                | 3                |
| Prostate cancer                               | 0       | 1 <sup>2</sup> | 1 <sup>3</sup> | 2 <sup>2</sup> | 1                | 3                |
| <b>IPSS <math>&gt;19</math><sup>4</sup></b>   | 26      | 27             | N/A            | N/A            | 26               | 27               |
| <b>Hemoglobin <math>\geq 17.5</math> g/dL</b> | 0       | 7              | N/A            | N/A            | 0                | 7                |
| <b>Cardiovascular<sup>5</sup></b>             |         |                |                |                |                  |                  |
| Myocardial infarction                         |         |                |                |                |                  |                  |
| Definite MI                                   | 0       | 2              | 8              | 1              | 8                | 3                |
| Probable MI                                   | 1       | 0              | 0              | 0              | 1                | 0                |
| Possible MI                                   | 1       | 0              | 0              | 0              | 1                | 0                |
| Cannot Determine                              | 0       | 0              | 0              | 1              | 0                | 1                |
| Stroke                                        |         |                |                |                |                  |                  |
| Definite                                      | 5       | 4              | 0              | 0              | 5                | 4                |
| Probable                                      | 0       | 1              | 0              | 1              | 0                | 2                |
| Cardiovascular death                          | 1       | 0              | 1              | 0              | 2                | 0                |
| Total MI, stroke, CV death                    | 7       | 7              | 9              | 2              | 16 <sup>1</sup>  | 9                |
| Hospitalization for arrhythmia                | 4       | 7              | 3              | 4              | 7                | 11               |
| Peripheral artery disease                     | 2       | 2              | 1              | 2              | 3                | 4                |
| Unstable angina                               | 4       | 0              | 2              | 1              | 6                | 1                |
| Cardiac intervention                          | 6       | 6              | 6              | 5              | 11 <sup>1</sup>  | 11               |
| Carotid artery disease <sup>6</sup>           | 4       | 1              | 1              | 1              | 5                | 2                |
| Decompensated heart failure                   | 6       | 2              | 2              | 0              | 8                | 2                |
| Venous thromboembolism                        | 3       | 2              | 2              | 2              | 5                | 4                |
| Aneurysm                                      | 0       | 1              | 0              | 1              | 0                | 2                |
| <b>Serious Adverse Events</b>                 |         |                |                |                |                  |                  |
| Death                                         | 7       | 3              | 4              | 4              | 11               | 7                |
| Hospitalization                               | 79      | 68             | 47             | 59             | 109 <sup>1</sup> | 114 <sup>1</sup> |
| Other <sup>7</sup>                            | 6       | 6              | 3              | 6              | 9                | 12               |

<sup>1</sup> Participants who had more than one event in a category or who had events in both year 1 and year 2 are counted only once in the total.

<sup>2</sup> Diagnosed following increase in PSA  $\geq 1.0$  ng/mL above baseline

<sup>3</sup> Diagnosed following detection of a prostate nodule

<sup>4</sup> The International Prostate Symptom Score (IPSS) is an 8 question screening tool used to identify symptoms of benign prostatic hyperplasia (BPH)

<sup>5</sup> Cardiovascular adverse events were collected by a specific questionnaire administered at each visit during treatment and for one year after treatment. Cardiovascular adverse events were also identified from the Adverse Event log and SAE Report Forms. The questionnaire, adverse event log and serious adverse event report form are included in the Supplemental materials. Cardiovascular events were adjudicated.

Myocardial infarction, stroke and death were adjudicated by two adjudicators, and all other events above by one adjudicator.

<sup>6</sup> Carotid artery disease that resulted in revascularization

<sup>7</sup> "Other" consists of those Serious Adverse Events labeled as Congenital Anomaly, Disability, Important Medical Event or Life Threatening

**Table S5. Incidence of Adverse Events >5% according to MedDRA System Organ Class (Year 1)**

| Body System                                                              | Testosterone (n = 395) |                       |        | Placebo (n = 395) |        |        |
|--------------------------------------------------------------------------|------------------------|-----------------------|--------|-------------------|--------|--------|
|                                                                          | n                      | %                     | Events | n                 | %      | Events |
| Cardiac disorders                                                        | 45                     | 11.4 %                | 82     | 45                | 11.4 % | 88     |
| Infections and infestations                                              | 152                    | 38.5 %                | 221    | 145               | 36.7 % | 220    |
| Eye disorders                                                            | 23                     | 5.8 %                 | 27     | 27                | 6.8 %  | 36     |
| Gastrointestinal disorders                                               | 65                     | 16.5 %                | 99     | 71                | 18.0 % | 116    |
| General disorders and administration site conditions                     | 74                     | 18.7 %                | 115    | 75                | 19.0 % | 99     |
| Injury, poisoning and procedural complications                           | 87                     | 22.0 %                | 143    | 89                | 22.5 % | 160    |
| Investigations                                                           | 45                     | 11.4 %                | 59     | 37                | 9.4 %  | 54     |
| Metabolism and nutrition disorders                                       | 24                     | 6.1 %                 | 31     | 29                | 7.3 %  | 34     |
| Musculoskeletal and connective tissue disorders                          | 145                    | 36.7 %                | 272    | 155               | 39.2 % | 293    |
| Neoplasms benign, malignant and unspecified (including cysts and polyps) | 28                     | 7.1 %                 | 35     | 22                | 5.6 %  | 27     |
| Nervous system disorders                                                 | 75                     | 19.0 %                | 101    | 78                | 19.7 % | 107    |
| Psychiatric disorders                                                    | 26                     | 6.6 %                 | 41     | 27                | 6.8 %  | 37     |
| Renal and urinary disorders                                              | 43                     | 10.9 %                | 59     | 42                | 10.6 % | 53     |
| Reproductive system and breast disorders                                 | 49                     | 12.4 % <sup>1,2</sup> | 63     | 19                | 4.8 %  | 22     |
| Respiratory, thoracic and mediastinal disorders                          | 74                     | 18.7 %                | 110    | 67                | 17.0 % | 106    |
| Skin and subcutaneous tissue disorders                                   | 88                     | 22.3 %                | 156    | 52                | 13.2 % | 75     |
| Surgical and medical procedures                                          | 36                     | 9.1%                  | 55     | 31                | 7.8 %  | 43     |
| Vascular disorders                                                       | 33                     | 8.4 %                 | 42     | 34                | 8.6 %  | 43     |

<sup>1</sup>p<0.001 compared to placebo

<sup>2</sup>Imbalances between the treatment arms in Reproductive System and Breast Disorders were primarily in breast tenderness and nipple pain.

<sup>3</sup>Imbalances between the treatment arms in Skin and Subcutaneous Tissue Disorders were primarily in acne, abnormal hair growth, erythema, and pruritus.

**Table S6. Incidence of Adverse Events > 5% according to MedDRA System Preferred Term (Year 1)**

| Preferred Term                    | Testosterone (n = 395) |        |        | Placebo (n = 395) |        |        |
|-----------------------------------|------------------------|--------|--------|-------------------|--------|--------|
|                                   | n                      | %      | Events | n                 | %      | Events |
| Oedema peripheral                 | 23                     | 5.8 %  | 28     | 16                | 4.1 %  | 19     |
| Upper respiratory tract infection | 59                     | 14.9 % | 66     | 64                | 16.2 % | 83     |
| Fall                              | 33                     | 8.4 %  | 42     | 36                | 9.1 %  | 45     |
| Arthralgia                        | 41                     | 10.4 % | 55     | 43                | 10.9 % | 58     |
| Back pain                         | 31                     | 7.8 %  | 33     | 23                | 5.8 %  | 27     |
| Musculoskeletal pain              | 19                     | 4.8 %  | 22     | 20                | 5.1 %  | 21     |
| Pain in extremity                 | 26                     | 6.6 %  | 28     | 36                | 9.1 %  | 43     |
| Hair growth abnormal              | 20                     | 5.1 %  | 22     | 2                 | 0.5 %  | 3      |
| Rash                              | 27                     | 6.8 %  | 39     | 17                | 4.3 %  | 25     |
